# Supplementary material for: Dishevelled 2 regulates cancer cell proliferation and T cell mediated immunity in HER2-positive breast cancer
Source: Springer Nature journal article supplement (doi:10.1186/s12885-023-10647-2), 2023-02-21
Supplement: MOESM2 [file 24050662]

Table S1 - Protein quantification of western blots of SKBR3 and BT474 cells expressing NTC vs shDVL2 treated with Neratinib

| Protein expression analysis : SKBR3 - Fold change in expression with NTC as control |     |        |          |             |  |  |
|-------------------------------------------------------------------------------------|-----|--------|----------|-------------|--|--|
|                                                                                     | NTC | shDVL2 | NTC+Nert | shDVL2+Nert |  |  |
| DVL2                                                                                | 1   | 0.51   | 1.22     | 0.39        |  |  |
| HER2                                                                                | 1   | 0.7    | 0.27     | 0.14        |  |  |
| p-Her2                                                                              | 1   | 2.72   | 0.11     | 0.17        |  |  |
| EGFR                                                                                | 1   | 0.73   | 1.24     | 0.37        |  |  |
| p-EGFR                                                                              | 1   | 1.04   | 0        | 0           |  |  |
| pan-Akt                                                                             | 1   | 1      | 1.28     | 0.87        |  |  |
| p-Akt                                                                               | 1   | 2.49   | 0        | 0           |  |  |
| CyclinD1                                                                            | 1   | 0.88   | 0.37     | 0.26        |  |  |
|                                                                                     |     |        |          |             |  |  |
| Protein expression analysis : BT474 - Fold change in expression with NTC as control |     |        |          |             |  |  |
|                                                                                     | NTC | shDVL2 | NTC+Nert | shDVL2+Nert |  |  |
| DVL2                                                                                | 1   | 0.23   | 0.79     | 0.21        |  |  |
| HER2                                                                                | 1   | 0.99   | 1.1      | 0.63        |  |  |
| p-Her2                                                                              | 1   | 0.72   | 0.45     | 0.24        |  |  |
| EGFR                                                                                | 1   | 0.77   | 0.7      | 0.43        |  |  |
| p-EGFR                                                                              | 1   | 0.55   | 0.09     | 0.06        |  |  |
| pan-Akt                                                                             | 1   | 0.87   | 1.49     | 0.67        |  |  |
| p-Akt                                                                               | 1   | 0.55   | 0.44     | 0.18        |  |  |
| CyclinD1                                                                            | 1   | 0.99   | 0.71     | 0.54        |  |  |

Table S2: Association between DVL-2 protein expression and clinicopathological parameters in HER2-positive breast cancer patient cohort at baseline (N=24, \*p<0.05)

| Variables                                   | DVL-2 |                      |         |
|---------------------------------------------|-------|----------------------|---------|
|                                             | N     | Mean±SEM             | p-value |
| <b>Age</b>                                  |       |                      |         |
| ≤51                                         | 8     | -0.1237 ±<br>0.1329  | 0.039*  |
| >51                                         | 16    | 0.4136 ± 0.206       |         |
| <b>BMI</b>                                  |       |                      |         |
| ≤30                                         | 18    | 0.2709 ±<br>0.1454   | 0.769   |
| >30                                         | 6     | 0.1253 ±<br>0.4527   |         |
| <b>ER status</b>                            |       |                      |         |
| +                                           | 15    | 0.2758 ±<br>0.2178   | 0.709   |
| -                                           | 9     | 0.1656 ±<br>0.1931   |         |
| <b>PR status</b>                            |       |                      |         |
| +                                           | 9     | 0.241 ± 0.3633       | 0.978   |
| -                                           | 15    | 0.2306 ±<br>0.1237   |         |
| <b>%Ki-67</b>                               |       |                      |         |
| <25                                         | 6     | 0.4152 ±<br>0.3778   | 0.578   |
| ≥25                                         | 17    | 0.1735 ±<br>0.1733   |         |
| <b>T stage</b>                              |       |                      |         |
| < T2                                        | 10    | 0.06733 ±<br>0.1779  | 0.331   |
| ≥ T2                                        | 14    | 0.3539 ±<br>0.2271   |         |
| <b>N stage</b>                              |       |                      |         |
| N0                                          | 12    | -0.03621 ±<br>0.1757 | 0.074   |
| ≥ N1                                        | 12    | 0.5052 ±<br>0.2283   |         |
| <b>M stage</b>                              |       |                      |         |
| M0                                          | 20    | 0.2331 ±<br>0.1824   | 0.966   |
| M1                                          | 4     | 0.2417 ±<br>0.07802  |         |
| <b>Neutrophil to lymphocyte Ratio (NLR)</b> |       |                      |         |
| <2                                          | 8     | 0.1055 ±<br>0.2677   | 0.567   |
| ≥2                                          | 15    | 0.3015 ±<br>0.2012   |         |
| <b>Platelet to lymphocyte Ratio (NLR)</b>   |       |                      |         |
| <133                                        | 7     | 0.3697 ±<br>0.3185   | 0.606   |

|                                       |    |                    |       |
|---------------------------------------|----|--------------------|-------|
| ≥133                                  | 16 | 0.1736 ±<br>0.1856 |       |
| <b>Neoadjuvant chemotherapy (NAC)</b> |    |                    |       |
| Yes                                   | 14 | 0.1683 ±<br>0.2183 | 0.604 |
| No                                    | 10 | 0.3272 ± 0.208     |       |

Table S3: Association between DVL-2 protein expression and cancer survival predictors in HER2-positive breast cancer patient cohort (N=24, p<0.05)

| Variables                                        | DVL-2 |                  |          |
|--------------------------------------------------|-------|------------------|----------|
|                                                  | N     | Mean diff. ± SEM | p-value  |
| <b>Pathologic complete response (pCR)</b>        |       |                  |          |
| Yes                                              | 7     | -1.201 ± 0.151   | 0.885    |
| No                                               | 5     | -1.127 ± 0.460   |          |
| <b>Tumor infiltrating lymphocyte (TIL) score</b> |       |                  |          |
| Biopsy                                           | 14    | -12.59 ± 3.927   | 0.004*   |
| Resection                                        | 10    | -8.744 ± 4.133   | 0.063    |
| <b>% CD8α levels</b>                             |       |                  |          |
| Biopsy                                           | 14    | -0.9869 ± 0.183  | <0.0001* |
| Resection                                        | 10    | 0.214 ± 0.159    | 0.205    |

Table S4: Spearman's rank correlation matrix for DVL2 and clinical parameters and/or survival predictors of breast cancer in 24 HER2-positive breast cancer patients after biopsy at baseline

|                                      | TIL score_baseline |       |    | DVL2_baseline |       |    | CD8a_baseline |       |    |
|--------------------------------------|--------------------|-------|----|---------------|-------|----|---------------|-------|----|
|                                      | rho                | rho.p | N  | rho           | rho.p | N  | rho           | rho.p | N  |
| Age                                  | -0.48              | 0.025 | 22 | 0.35          | 0.094 | 24 | -0.30         | 0.156 | 24 |
| Age >51 years                        | -0.39              | 0.071 | 22 | 0.37          | 0.075 | 24 | -0.20         | 0.338 | 24 |
| BMI                                  | -0.17              | 0.447 | 22 | -0.10         | 0.626 | 24 | 0.24          | 0.265 | 24 |
| BMI >30                              | -0.26              | 0.249 | 22 | -0.10         | 0.651 | 24 | 0.38          | 0.071 | 24 |
| Clinical Stage                       | -0.13              | 0.563 | 22 | 0.18          | 0.400 | 24 | -0.25         | 0.244 | 24 |
| ER status                            | 0.40               | 0.064 | 22 | 0.08          | 0.707 | 24 | 0.19          | 0.383 | 24 |
| %Ki67 >25                            | 0.37               | 0.094 | 21 | -0.10         | 0.635 | 23 | -0.31         | 0.145 | 23 |
| M stage                              | 0.00               | 1.000 | 22 | 0.10          | 0.652 | 24 | -0.06         | 0.764 | 24 |
| After resection_CD8a levels          | 0.13               | 0.725 | 10 | -0.11         | 0.744 | 12 | -0.19         | 0.561 | 12 |
| Baseline_CD8a levels                 | -0.20              | 0.379 | 22 | -0.27         | 0.206 | 24 | 1.00          | na    | na |
| After resection_DVL2 levels          | 0.31               | 0.387 | 10 | -0.10         | 0.749 | 12 | 0.07          | 0.835 | 12 |
| Baseline_DVL2 levels                 | -0.02              | 0.916 | 22 | 1.00          | na    | na | -0.27         | 0.206 | 24 |
| After resection_TIL score            | 0.40               | 0.250 | 10 | 0.58          | 0.082 | 10 | -0.56         | 0.097 | 10 |
| Baseline_TIL score                   | 1.00               | na    | na | -0.02         | 0.916 | 22 | -0.20         | 0.379 | 22 |
| N stage                              | 0.22               | 0.334 | 22 | 0.40          | 0.055 | 24 | -0.42         | 0.040 | 24 |
| NAC_yes                              | 0.19               | 0.386 | 22 | -0.10         | 0.650 | 24 | 0.06          | 0.777 | 24 |
| Neutrophil to lymphocyte Ratio (NLR) | -0.01              | 0.958 | 21 | 0.35          | 0.101 | 23 | -0.32         | 0.143 | 23 |
| pCR_cat_yes1_no0                     | -0.12              | 0.792 | 11 | -0.30         | 0.354 | 13 | 0.13          | 0.724 | 13 |
| Platelet to Lymphocyte Ratio (PLR)   | -0.33              | 0.149 | 21 | -0.08         | 0.723 | 23 | 0.20          | 0.353 | 23 |
| PR status                            | -0.19              | 0.387 | 22 | -0.17         | 0.433 | 24 | 0.47          | 0.022 | 24 |
| Residual Tumor Burden Index          | 0.24               | 0.280 | 22 | 0.10          | 0.637 | 24 | -0.01         | 0.955 | 24 |
| T stage                              | -0.19              | 0.428 | 20 | 0.12          | 0.605 | 21 | -0.05         | 0.829 | 21 |

Table S5: Spearman's rank correlation matrix for DVL2 and clinical parameters and/or survival predictors of breast cancer at baseline in 14 HER2-positive breast cancer patients who received neoadjuvant chemotherapy (NAC)

|                                      | TIL score_at biopsy |       |    | DVL2_at biopsy |       |    | CD8a_at biopsy |       |    |
|--------------------------------------|---------------------|-------|----|----------------|-------|----|----------------|-------|----|
|                                      | rho                 | rho.p | N  | rho            | rho.p | N  | rho            | rho.p | N  |
| Age                                  | -0.50               | 0.100 | 12 | 0.50           | 0.069 | 14 | -0.13          | 0.651 | 14 |
| Age >51 years                        | -0.41               | 0.195 | 12 | 0.48           | 0.097 | 14 | -0.05          | 0.871 | 14 |
| BMI                                  | -0.14               | 0.671 | 12 | -0.06          | 0.829 | 14 | 0.48           | 0.081 | 14 |
| BMI >30                              | -0.08               | 0.832 | 12 | 0.00           | 1.055 | 14 | 0.51           | 0.072 | 14 |
| Clinical Stage                       | -0.42               | 0.195 | 12 | 0.19           | 0.555 | 14 | -0.19          | 0.538 | 14 |
| ER status                            | 0.59                | 0.059 | 12 | -0.19          | 0.555 | 14 | 0.17           | 0.571 | 14 |
| %Ki67 >25                            | 0.50                | 0.182 | 11 | 0.46           | 0.154 | 13 | -0.46          | 0.154 | 13 |
| After resection_CD8a levels          | 0.13                | 0.725 | 10 | -0.11          | 0.744 | 12 | -0.19          | 0.561 | 12 |
| Baseline_CD8a levels                 | -0.05               | 0.874 | 12 | -0.67          | 0.010 | 14 | 1.00           | na    | na |
| After resection_DVL2 levels          | 0.31                | 0.387 | 10 | -0.10          | 0.749 | 12 | 0.07           | 0.835 | 12 |
| Baseline_DVL2 levels                 | 0.07                | 0.829 | 12 | 1.00           | na    | na | -0.67          | 0.010 | 14 |
| After resection_TIL score            | 0.40                | 0.250 | 10 | 0.58           | 0.082 | 10 | -0.56          | 0.097 | 10 |
| Baseline_TIL score                   | 1.00                | na    | na | 0.07           | 0.829 | 12 | -0.05          | 0.874 | 12 |
| N stage                              | 0.27                | 0.418 | 12 | 0.43           | 0.142 | 14 | -0.43          | 0.134 | 14 |
| Neutrophil to lymphocyte Ratio (NLR) | -0.06               | 0.847 | 12 | 0.58           | 0.033 | 14 | -0.59          | 0.030 | 14 |
| pCR_yes                              | -0.12               | 0.792 | 11 | -0.30          | 0.354 | 13 | 0.13           | 0.724 | 13 |
| Platelet to Lymphocyte Ratio (PLR)   | -0.25               | 0.433 | 12 | -0.24          | 0.409 | 14 | -0.01          | 0.985 | 14 |
| PR status                            | -0.17               | 0.619 | 12 | -0.55          | 0.053 | 14 | 0.66           | 0.017 | 14 |
| Residual Tumor Burden Index          | 0.29                | 0.400 | 11 | 0.17           | 0.622 | 13 | 0.00           | 1.025 | 13 |
| T stage                              | -0.56               | 0.067 | 12 | 0.13           | 0.699 | 14 | 0.06           | 0.869 | 14 |

Table S6: Spearman's rank correlation matrix for DVL2 and clinical parameters and/or survival predictors of breast cancer after resection in 14 HER2-positive breast cancer patients who received neoadjuvant chemotherapy (NAC)

|                                      | TIL score_after resection |       |    | DVL2_after resection |       |    | CD8a_after resection |       |    |
|--------------------------------------|---------------------------|-------|----|----------------------|-------|----|----------------------|-------|----|
|                                      | rho                       | rho.p | N  | rho                  | rho.p | N  | rho                  | rho.p | N  |
| Age                                  | -0.17                     | 0.638 | 10 | -0.16                | 0.614 | 12 | -0.34                | 0.275 | 12 |
| Age >51 years                        | 0.03                      | 0.952 | 10 | -0.19                | 0.589 | 12 | -0.05                | 0.900 | 12 |
| BMI                                  | -0.30                     | 0.387 | 10 | -0.19                | 0.561 | 12 | -0.31                | 0.331 | 12 |
| BMI >30                              | 0.00                      | 1.050 | 10 | 0.05                 | 0.933 | 12 | -0.21                | 0.541 | 12 |
| Clinical Stage                       | 0.00                      | 1.067 | 10 | -0.26                | 0.485 | 12 | 0.55                 | 0.076 | 12 |
| ER status                            | 0.04                      | 0.933 | 10 | 0.00                 | 1.091 | 12 | 0.32                 | 0.348 | 12 |
| %Ki67 >25                            | 0.62                      | 0.082 | 9  | 0.39                 | 0.239 | 11 | 0.20                 | 0.549 | 11 |
| After resection_CD8a levels          | 0.32                      | 0.368 | 10 | -0.02                | 0.961 | 12 | 1.00                 | na    | na |
| Baseline_CD8a levels                 | -0.56                     | 0.097 | 10 | 0.07                 | 0.835 | 12 | -0.19                | 0.561 | 12 |
| After resection_DVL2 levels          | 0.53                      | 0.115 | 10 | 1.00                 | na    | na | -0.02                | 0.961 | 12 |
| Baseline_DVL2 levels                 | 0.58                      | 0.082 | 10 | -0.10                | 0.749 | 12 | -0.11                | 0.744 | 12 |
| After resection_TIL score            | 1.00                      | na    | na | 0.53                 | 0.115 | 10 | 0.32                 | 0.368 | 10 |
| Baseline_TIL score                   | 0.40                      | 0.250 | 10 | 0.31                 | 0.387 | 10 | 0.13                 | 0.725 | 10 |
| N stage                              | 0.24                      | 0.500 | 10 | -0.27                | 0.432 | 12 | 0.59                 | 0.052 | 12 |
| Neutrophil to lymphocyte Ratio (NLR) | 0.28                      | 0.431 | 10 | 0.01                 | 0.991 | 12 | -0.08                | 0.804 | 12 |
| pCR_yes                              | -0.07                     | 0.889 | 10 | -0.07                | 0.876 | 12 | -0.07                | 0.841 | 12 |
| Platelet to Lymphocyte Ratio (PLR)   | -0.62                     | 0.061 | 10 | -0.32                | 0.308 | 12 | 0.05                 | 0.891 | 12 |
| PR status                            | -0.42                     | 0.246 | 10 | 0.00                 | 1.063 | 12 | -0.31                | 0.329 | 12 |
| Residual Tumor Burden Index          | 0.19                      | 0.586 | 10 | 0.17                 | 0.596 | 12 | 0.06                 | 0.851 | 12 |
| T stage                              | 0.04                      | 0.950 | 10 | 0.00                 | 1.067 | 12 | 0.38                 | 0.230 | 12 |

Table S7: Spearman's rank correlation matrix for DVL2 and clinical parameters and/or survival predictors of breast cancer at baseline biopsy in 10 HER2-positive breast cancer patients who didn't receive neoadjuvant chemotherapy (NAC)

|                                      | TIL score_at biopsy |       |    | DVL2_at biopsy |       |    | CD8a_at biopsy |       |    |
|--------------------------------------|---------------------|-------|----|----------------|-------|----|----------------|-------|----|
|                                      | rho                 | rho.p | N  | rho            | rho.p | N  | rho            | rho.p | N  |
| Age                                  | -0.41               | 0.237 | 10 | 0.09           | 0.800 | 10 | -0.19          | 0.591 | 10 |
| Age >51 years                        | 0.06                | 1.000 | 10 | -0.06          | 1.000 | 10 | -0.41          | 0.400 | 10 |
| BMI                                  | -0.60               | 0.073 | 10 | 0.22           | 0.537 | 10 | 0.15           | 0.682 | 10 |
| BMI >30                              | -0.52               | 0.178 | 10 | -0.17          | 0.711 | 10 | 0.26           | 0.533 | 10 |
| Clinical Stage                       | 0.12                | 0.741 | 10 | 0.31           | 0.376 | 10 | -0.36          | 0.302 | 10 |
| ER status                            | -0.14               | 0.762 | 10 | 0.43           | 0.257 | 10 | 0.14           | 0.762 | 10 |
| %Ki67 >25                            | 0.17                | 0.690 | 10 | -0.45          | 0.222 | 10 | -0.38          | 0.310 | 10 |
| M stage                              | 0.21                | 0.610 | 10 | 0.14           | 0.762 | 10 | -0.14          | 0.762 | 10 |
| Baseline_CD8a levels                 | -0.50               | 0.144 | 10 | 0.31           | 0.387 | 10 | 1.00           | na    | na |
| Baseline_DVL2 levels                 | -0.43               | 0.218 | 10 | 1.00           | na    | na | 0.31           | 0.387 | 10 |
| Baseline_TIL score                   | 1.00                | na    | na | -0.43          | 0.218 | 10 | -0.50          | 0.144 | 10 |
| N stage                              | 0.12                | 0.736 | 10 | 0.31           | 0.390 | 10 | -0.56          | 0.100 | 10 |
| Neutrophil to lymphocyte Ratio (NLR) | 0.28                | 0.463 | 9  | -0.15          | 0.708 | 9  | 0.05           | 0.912 | 9  |
| Platelet to Lymphocyte Ratio (PLR)   | -0.72               | 0.056 | 9  | 0.52           | 0.222 | 9  | 0.52           | 0.222 | 9  |
| PR_status                            | -0.52               | 0.178 | 10 | 0.70           | 0.044 | 10 | 0.26           | 0.533 | 10 |
| T stage                              | -0.03               | 1.000 | 10 | 0.45           | 0.222 | 10 | -0.24          | 0.548 | 10 |

Table S8 - ChIP primers used for the study

| Gene  | Forward Primer        | Reverse Primer       |
|-------|-----------------------|----------------------|
| HLA-A | TCTCCCTCTCCCAACCTACG  | CAGAGGCGGTTTCCCTCC   |
| HLA-C | CGGCGGTGTCGAAATACCTC  | TCATGACGCGTCCCAATTC  |
| STAT1 | AAAGACTCCCCAGGTGCCAA  | GACGAGTTTAACGGCCTGCT |
| STAT6 | CGCAGCACCTATCTGAGCA   | CTTTTCTGTTGCCCATCCA  |
| TGFB1 | GTTAGTGCGATCCAGAGAGGC | AACTCCAGGCATCTGAGGGA |

Table S9 - mRNA Primers used for the study

| Gene   | Forward Primer          | Reverse Primer            |
|--------|-------------------------|---------------------------|
| DVL2   | GAGCCAGGGGACATGCTTTT    | GCTCATTTTCGGGGGAGAGTG     |
| HLA-C  | GGTTGTCCTAGCTGTCCTTGG   | TGCTAACAGGAACGCAGACA      |
| TGFB1  | ATGTCACCTGCCTCCACCCATC  | ACCTGCTCTGAGGCCTGAAAG     |
| STAT1  | CCTTCAGTCTTTTCCAGCAGC   | CTCATTACATCTCTCAACTTAC    |
| STAT6  | TTGAACTCGCTGGACAGAGC    | TGCTCTCAAGGGTGCTGATG      |
| DVL3   | CTTCATCCGCCATACCGTCA    | CGGGTACTGGTACGGGAAAG      |
| CTNNB1 | CTTGATATTGGTGCCAGGGA    | AACCACTCCCACCCTACCAAC     |
| CCND1  | TCTTGTGCCACAGATGTGAAGTT | GAGGCAGTCTGGGTCACACTT     |
| POU5F1 | CTTGAATCCCGAATGGAAAGGG  | GTGTATATCCCAGGGTGATCCTC   |
| VEGFA  | CCCACTGAGGAGTCCACCAT    | TTTCTTGCCTTTTCGTTTTT      |
| MMP7   | GCCCAGATGTGGAGTGCCAGA   | TGAGCTCCTCGCGCAAAGCC      |
| HER2   | AGCCGCGAGCACCCAAGT      | TTGGTGGGCAGGTAGGTGAGTT    |
| AKT1   | CATCTGTCACCAGGGGCTTAG   | TGTAGCCAATGAAGGTGCCAT     |
| B2M    | CACCCCACTGAAAAAGATG     | ATATTA AAAAGCAAGCAAGCAGAA |
| GAPDH  | TCGGAGTCAACGGATTTGGT    | TTCCCGTTCTCAGCCTTGAC      |

Table S10 - Antibodies used for the study

| Antibody     | Dilution | Mol weight | catalog  | Vendor         | Species |
|--------------|----------|------------|----------|----------------|---------|
| DVL2         | 1 .200   | 92 kd      | C375617  | Lsbio          | Rabbit  |
| Lamin        | 1 .2000  | 74/63 kd   | 477S     | Cell signaling | Mouse   |
| Tubulin      | 1 .4000  | 55 kd      | T7816    | Sigma          | Mouise  |
| DVL2         | 1 .1000  | 92 kd      | 3224S    | Cell signaling | Rabbit  |
| HER2         | 1 .1000  | 185 Kd     | 4290s    | Cell signaling | Rabbit  |
| phospho-HER2 | 1 .1000  | 185 kd     | 2244S    | Cell signaling | Rabbit  |
| EGFR         | 1 .1000  | 175 Kd     | 4267s    | Cell signaling | Rabbit  |
| Phospho-EGFR | 1 .1000  | 175 kd     | 3777S    | Cell signaling | Rabbit  |
| Pan Akt      | 1 .1000  | 60 kd      | 4691S    | Cell signaling | Rabbit  |
| phospho-Akt  | 1 .1000  | 60 kd      | 4060s    | Cell signaling | Rabbit  |
| CyclinD1     | 1 .10000 | 34 kd      | ab134175 | Abcam          | Rabbit  |
